# Supplementary material
Source: publisher figshare collection journal article supplement (https://acs.figshare.com/ndownloader/files/4659679)
Supplement: Supplementary file 1 [file 4659679]

# Effect of Seed Layer on Structural Properties of ZnO Nanorod Arrays Grown by Vapor-Phase Transport

*Chun Li,<sup>†,‡</sup> Guojia Fang,<sup>†,‡,\*</sup> Jun Li,<sup>†</sup> Lei Ai,<sup>†</sup> Binzhong Dong<sup>†</sup> and Xingzhong Zhao<sup>†</sup>*

Key Laboratory of Acoustic and Photonic Materials and Devices of Ministry of Education, Department of Electronic Science and Technology, School of Physical Science and Technology, Wuhan University, Wuhan, 430072, P. R. China, and State Key Laboratory of Transducer Technology, Chinese Academy of Sciences, Shanghai, 200050, P. R. China

\* To whom correspondence should be addressed. Tel: +86 27 87642784. Fax: +86 27 68752569;

e-mail: [gjfang@whu.edu.cn](mailto:gjfang@whu.edu.cn). <sup>†</sup>Wuhan University. <sup>‡</sup>Chinese Academy of Sciences

## Supporting Information Available

**Table S1.** Deposition conditions of ZnO seed layer films.

| Deposition techniques                  | Base pressure (Pa)   | O <sub>2</sub> :Ar | Work pressure (Pa) | $T_{\text{sub}}$ (°C) | Thickness (nm)   |
|----------------------------------------|----------------------|--------------------|--------------------|-----------------------|------------------|
| DC sputtering with Zn target           | $4.1 \times 10^{-4}$ | 0:1                | 1.0                | RT                    | 180 <sup>a</sup> |
| Reactive DC sputtering with Zn target  | $5.0 \times 10^{-4}$ | 1:4                | 5                  | 300                   | 200              |
| Reactive RF sputtering with ZnO target | $6.5 \times 10^{-4}$ | 1:4                | 0.5                | 300                   | 250              |
| PLD with ZnO target                    | $1.0 \times 10^{-3}$ | 1:0                | 0.02               | 300                   | 240              |

<sup>a</sup> The thickness indicates the Zn film after thermal oxidation.

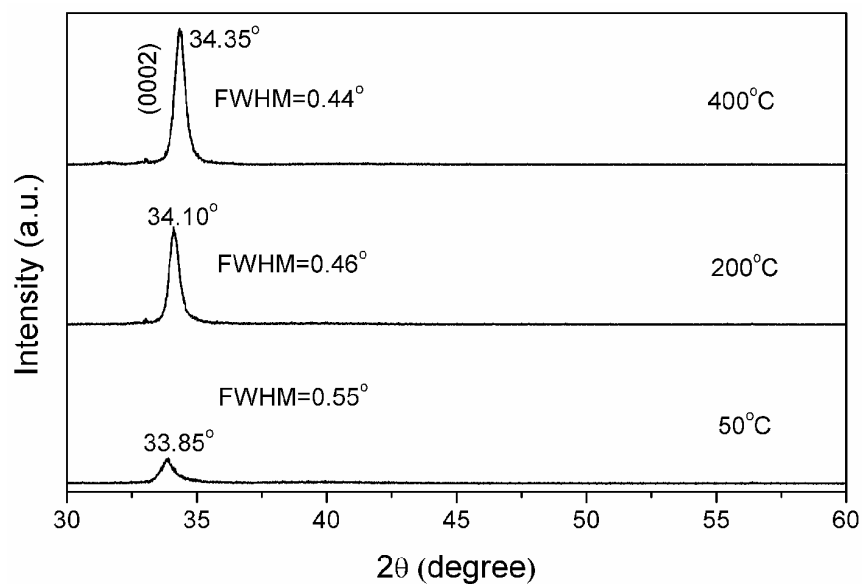

**Figure S1.** XRD patterns of ZnO seed layer deposited by rf sputtering at substrate temperatures of 50 °C, 200 °C, and 400 °C.

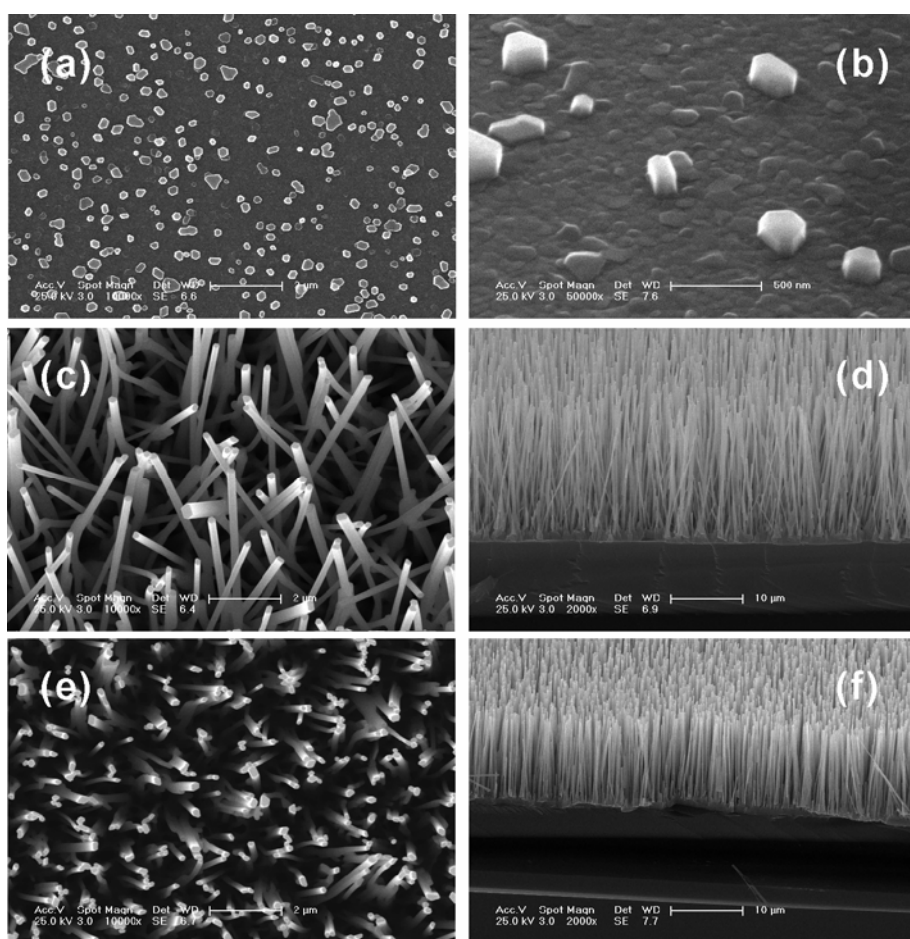

**Figure S2.** SEM images of ZnO nanorod arrays grown on rf sputtered seed layer deposited at (a), (b) 50 °C; (c), (d) 200 °C; and (e), (f) 400 °C with the same nanorod growth conditions.
